# Supplementary material for: Interleukin-33-Dependent Accumulation of Regulatory T Cells Mediates Pulmonary Epithelial Regeneration During Acute Respiratory Distress Syndrome
Source: PubMed Central journal article supplement (PMC8082076; doi:10.3389/fimmu.2021.653803), 2021-04-15

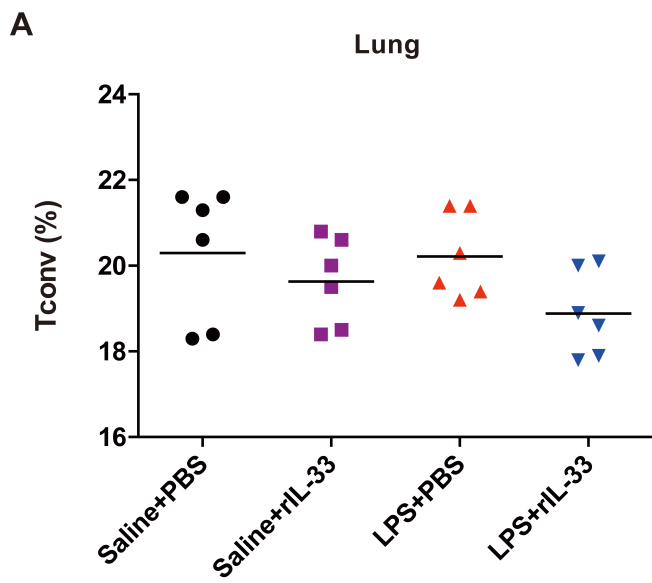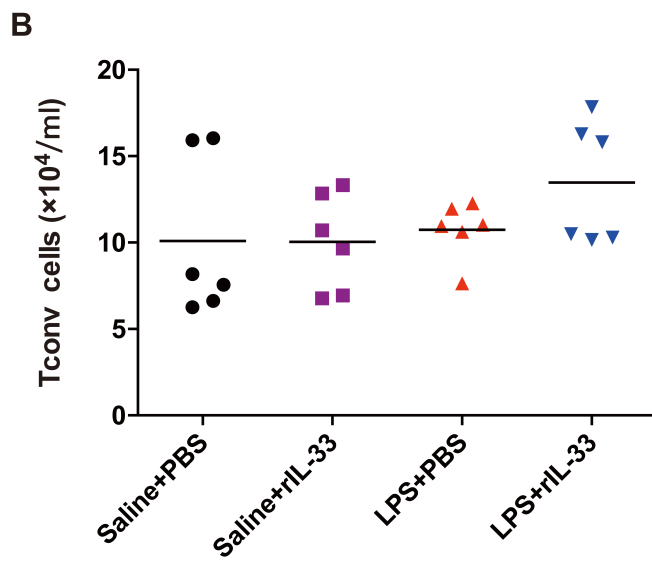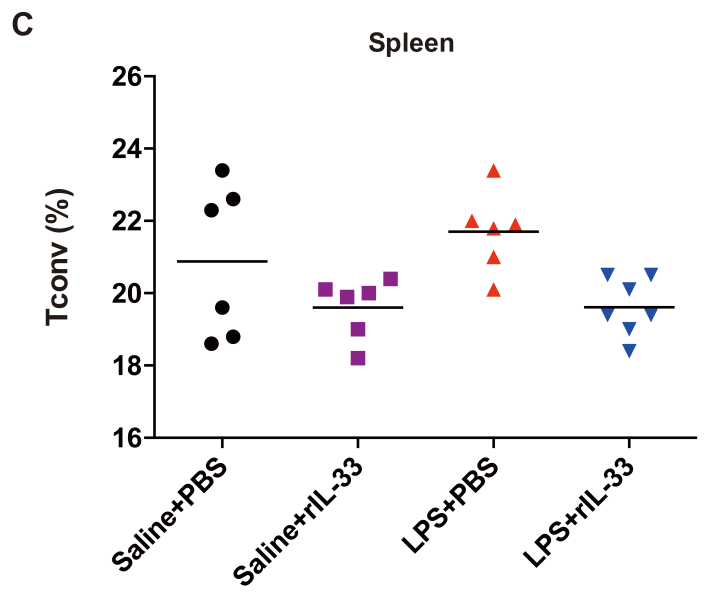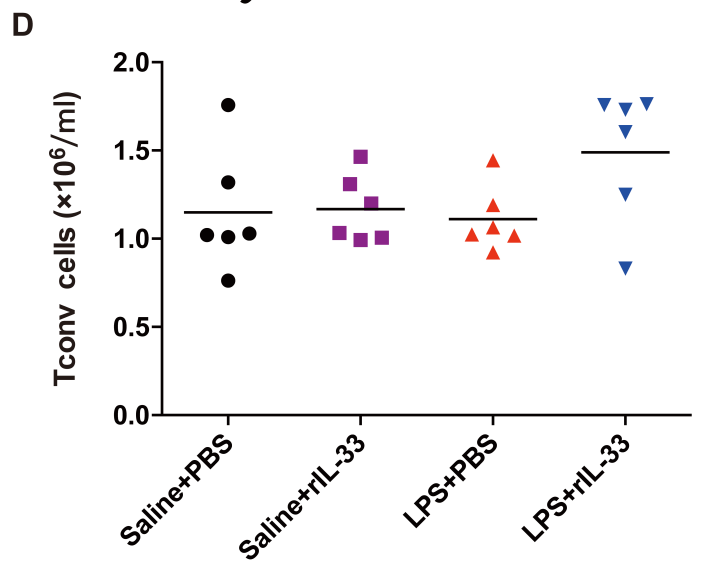

Supplement: Image_2.pdf [file Image_2.pdf]
